# Supplementary material
Source: PubMed Central journal article supplement (PMC2556813)
Supplement: pp.108.124917_2.pdf [file pp.108.124917_2.pdf]

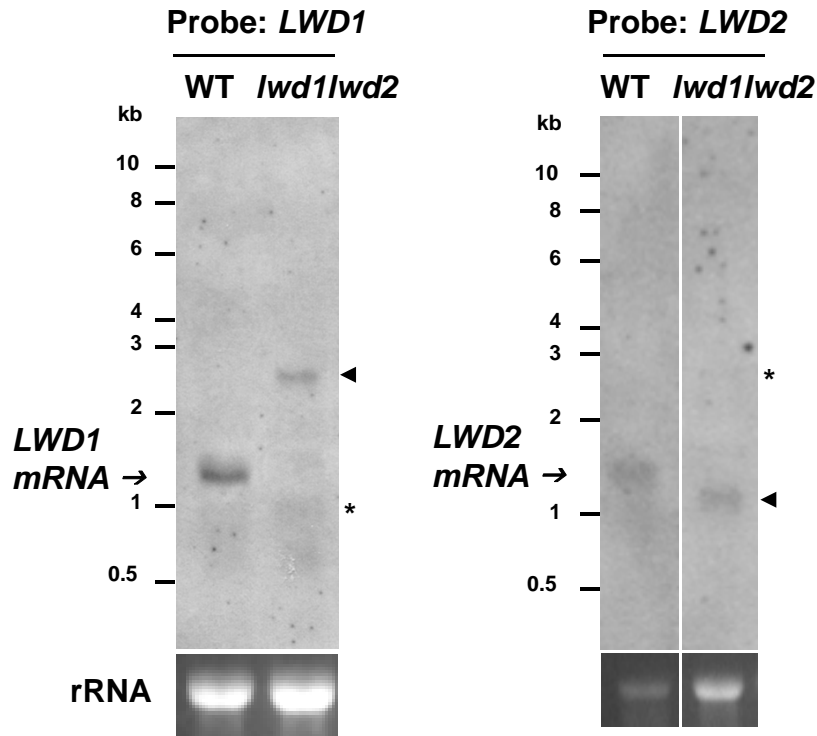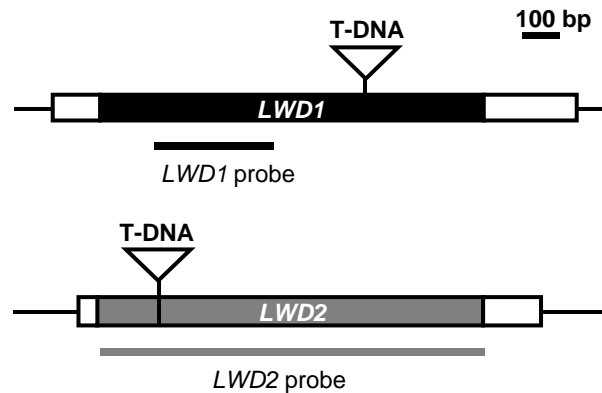

**Supplemental Figure S2. Northern blot analyses of *LWD1* and *LWD2* in *lwd1/lwd2* double-mutant plants**

Northern blot analyses of *LWD1/LWD2* expression in wild-type and *lwd1/lwd2* double-mutant plants. RNA isolated from 4-week-old wild-type (Col-0) and *lwd1/lwd2* Arabidopsis rosette leaves was used in northern blot hybridization with the coding sequence of DIG-labeled *LWD1* (black line below *LWD1* gene model) or *LWD2* (grey line below *LWD2* gene model) used as probes. Autoradiograph and an image of the rRNA stained with ethidium bromide are shown. Triangles mark the detection of a read-through *LWD1* and a truncated *LWD2* transcript. The asterisks represent hybridization signals possibly from cross-hybridization of *LWD2* (*LWD1*) transcripts by *LWD1* (*LWD2*) probes
