# Supplementary material
Source: PubMed Central journal article supplement (PMC2556813)
Supplement: pp.108.124917_3.pdf [file pp.108.124917_3.pdf]

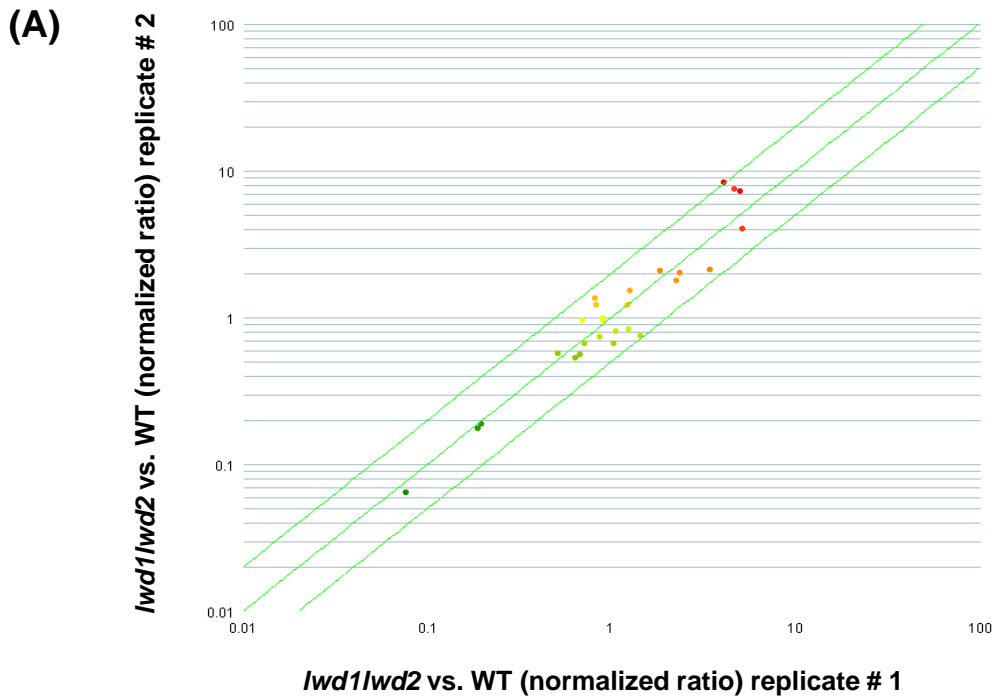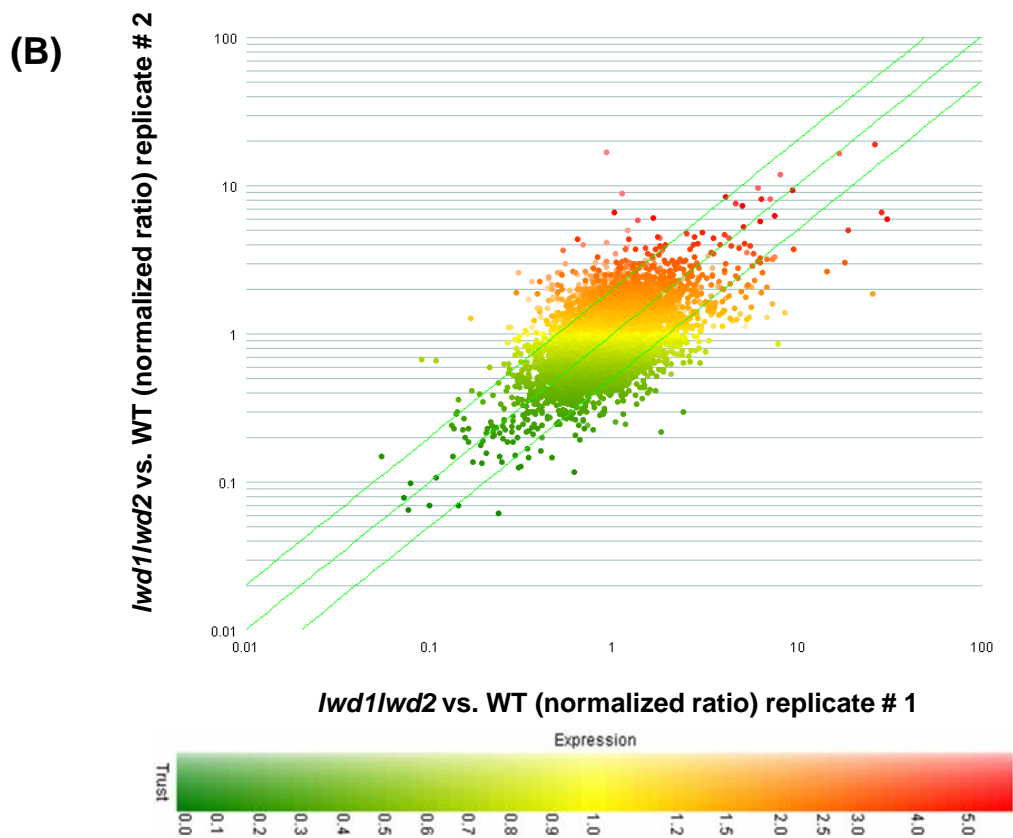

**Supplemental Figure S3. Differential gene expression is highly correlated between the 2 biological replicates of ATH1 hybridization.**

Correlation in fold expression from the two *lwd1/lwd2*/wild-type pair-wise biological replicates experiments was calculated with the “Find similar sample” function in GeneSpring 7.3.1 (Silicon Genetics, Redwood, CA, USA). (A) A correlation coefficient of 0.86 for 27 genes in Figure 2. (B) A correlation coefficient of 0.96 for 13,718 genes flagged as present or marginal in two independent ATH1 experiments.
