# Supplementary material
Source: PubMed Central journal article supplement (PMC2556813)
Supplement: pp.108.124917_4.pdf [file pp.108.124917_4.pdf]

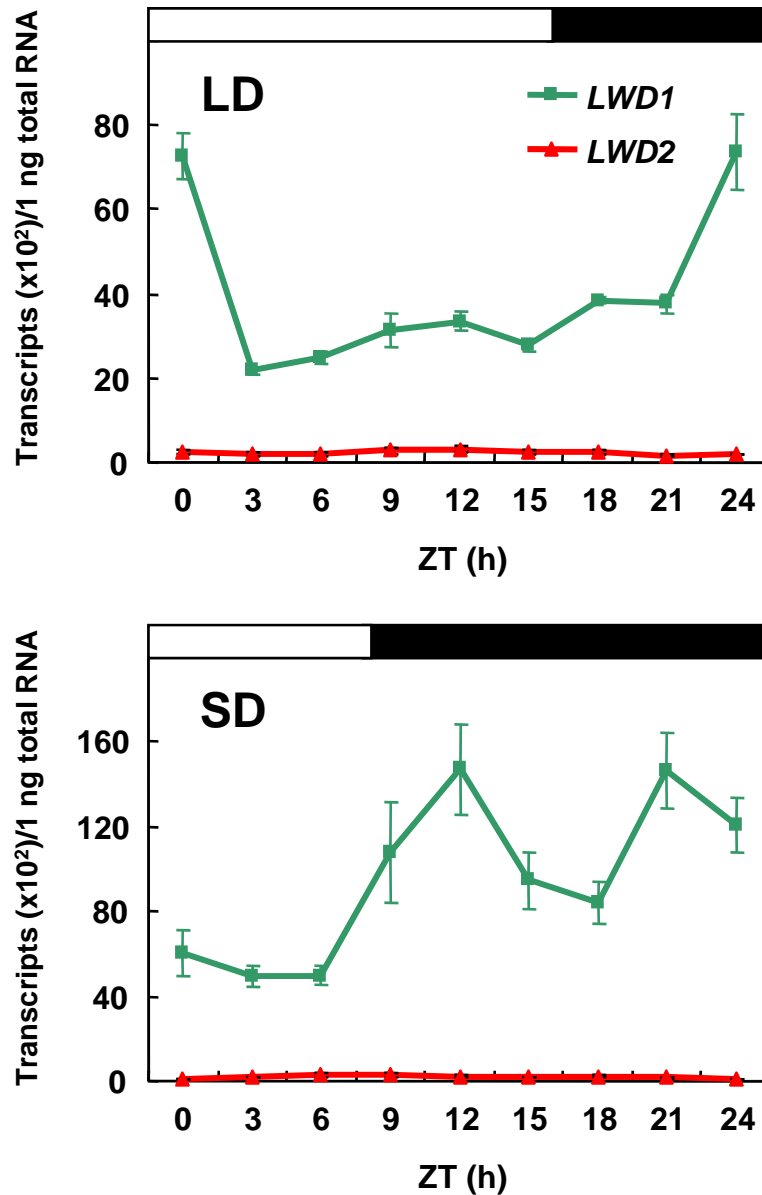

**Supplemental Figure S4. Absolute quantitation of *LWD1* and *LWD2* transcripts in Arabidopsis**

18-d-old wild-type Arabidopsis plants grown under LD (16-h L/8-h D) or SD (8-h L/16-h D) conditions were harvested at different zeitgeber (ZT) times for total RNA isolation. As described in Materials and Methods, quantitative RT-PCR was used for absolute quantification of the expression of *LWD1* and *LWD2* with known serial concentrations of plasmid DNA harboring *LWD1* or *LWD2* as standards. The expression of *UBQ10* was also analyzed to normalize the input RNA in each sample.
