# Supplementary material
Source: PubMed Central journal article supplement (PMC2556813)
Supplement: pp.108.124917_5.pdf [file pp.108.124917_5.pdf]

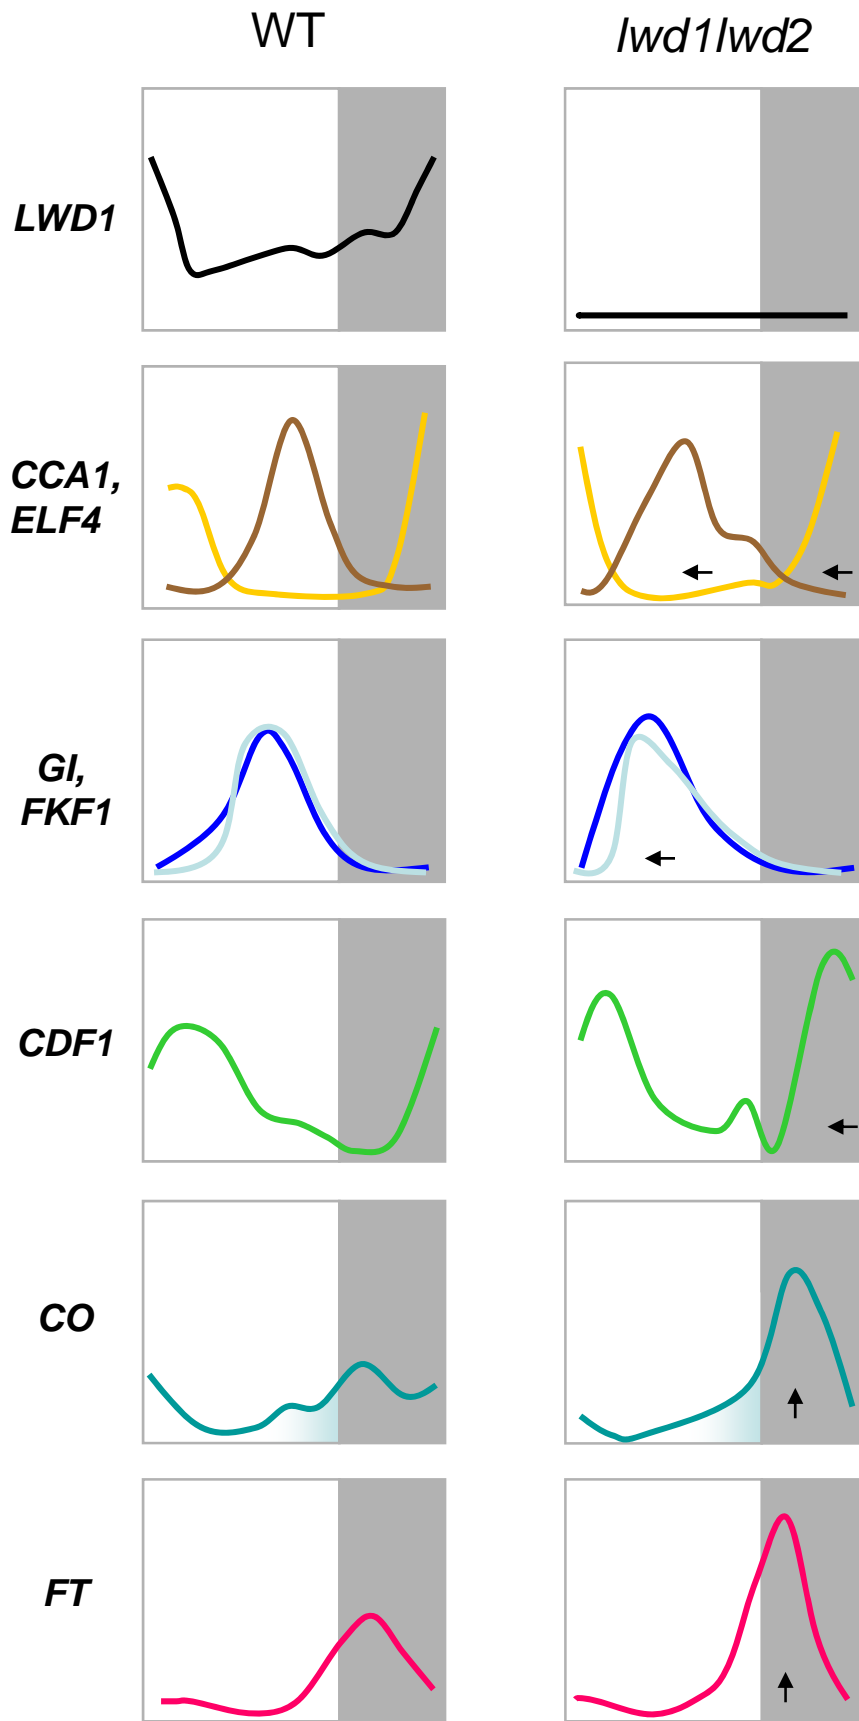

**Supplemental Figure S5. An illustration showing how LWDs regulate the temporal expression pattern of oscillator and output genes in photoperiod sensing under LD condition**
