# Supplementary material
Source: PubMed Central journal article supplement (PMC2556813)
Supplement: pp.108.124917_9.pdf [file pp.108.124917_9.pdf]

# Supplemental Primer Table.

## Primer used for qRT-PCR

| Name             | Sequence (5' → 3')            | Volume in 50 µl rxn |
|------------------|-------------------------------|---------------------|
| UBQ10-ABI-1      | AGAAGTTCAATGTTTCGTTTCATGTAA   | 6                   |
| UBQ10-ABI-2      | GAACGGAAACATAGTAGAACACTTATTCA | 6                   |
| LWD1-1242-ABI-S  | GGTCTCGTTACCCTTGTTACTATCCT    | 6                   |
| LWD1-1293-ABI-AS | CGATTGAGAACAGTCTTTACATCTTGA   | 6                   |
| LWD2-1098-ABI-S  | ATGTTTTACAGATTCTGTGG          | 6                   |
| LWD2-1231-ABI-AS | GGTACATAGTTCCTACACAG          | 3                   |
| CCA1-1695-ABI-S  | CTGTGTCTGACGAGGGTGGAA         | 6                   |
| CCA1-1768-ABI-AS | ATATGTAAAACCTTTGCGGCAATACCT   | 6                   |
| LHY-1991-ABI-S   | CAACAGCAACAACAATGCAACTAC      | 3                   |
| LHY-2067-ABI-AS  | AGAGAGCCTGAAACGCTATACGA       | 6                   |
| TOC1-725-ABI-S   | ATCTTCGCAGAATCCCTGTGATA       | 9                   |
| TOC1-803-ABI-AS  | GCACCTAGCTTCAAGCACTTTACA      | 9                   |
| ELF4-185-ABI-S   | CGACAATCACCAATCGAGAATG        | 3                   |
| ELF4-260-ABI-AS  | AATGTTTCCGTTGAGTTCTTGAATC     | 3                   |
| GI-3513-ABI-S    | ACTAGCAGTGGTCGACGGTTTATC      | 6                   |
| GI-3563-ABI-AS   | GCTGGTAGACGACACTTCAATAGATT    | 6                   |
| FKF1-1583-ABI-S  | GAGCTTGAGTGTAGCGCATTCC        | 3                   |
| FKF1-1652-ABI-AS | TGCTCACAGCCACATGGTCTAG        | 3                   |
| CDF1-678-ABI-S   | CACGTGGAATCCTGCGTTTT          | 3                   |
| CDF1-732-ABI-AS  | CAACACTGGCATGCTCCAATAA        | 6                   |
| CO-811-ABI-S     | CATTAACCATAACGCATACATTTTCATC  | 9                   |
| CO-861-ABI-AS    | TCCGGCACAACACCAGTTT           | 3                   |
| FT-336-ABI-S     | ATCTCCATTGGTTGGTGACTGATA      | 9                   |
| FT-388-ABI-AS    | GCCAAAGTTGTTCAGTTGTAG         | 1                   |
| CCR2-593-ABI-S   | GGAGGATGGTAATTCCTTTAATTAGGT   | 3                   |
| CCR2-679-ABI-AS  | CACACAAAACCAAGTAGAAGCATAACA   | 9                   |
| CAB2-950-ABI-S   | GTTTGTGTTTGTGGTGGATGGT        | 1                   |
| CAB2-1099-ABI-AS | CGGAGTGAACCCAAGAACTGA         | 3                   |

## Primer used for cloning, RT-PCR and probe synthesis

| Name                             | Sequence (5' → 3')              |
|----------------------------------|---------------------------------|
| pLWD1- <i>Pst</i> I-S            | AAACTGCAGAGTGGGAAAACCTTTGGTGATG |
| LWD1- <i>Sma</i> I-2-AS          | TCCCGGGGCAACCCTGAGAATTTGCAG     |
| LWD1(+334~+354)-S                | CCAATGGTGAGATCCGTTCCG           |
| LWD1(+830~+807)-AS               | GTTCCAACCAAGACGCACTAAAGG        |
| LWD2- <i>Xba</i> I-2-S           | GCTCTAGACCATGGTTACGAGCAGCGAT    |
| LWD2- <i>Sma</i> I-2-AS          | TCCCGGGGCGACCCGGAGAATCTGCAG     |
| LWD1- <i>Cla</i> I-stop-AS       | GCATCGATTCAAACCTGAGAATTTG       |
| LWD2-5-F                         | GGTTTATGCTACATTGAAGCAAAG        |
| At3g26640-LWD2- <i>Sal</i> I-AS1 | GCATGTCGACTCAGACCCGGAGAATCTG    |
| UBQ10-5'                         | ATTTCTCAAAATCTTAAAAACTT         |
| UBQ10-3'-2                       | TGATAGTTTTCCAGTCAAC             |
