# Supplementary material
Source: PubMed Central journal article supplement (PMC2556813)
Supplement: pp.108.124917v2_1.pdf [file pp.108.124917v2_1.pdf]

**Supplemental Tabs S1. ATH1 expression data for genes in 4 different pathways regulating flowering time.**

|               | Gene             | Locus     | Repeat1 |       |          |       |            | Repeat2 |       |          |       |            |
|---------------|------------------|-----------|---------|-------|----------|-------|------------|---------|-------|----------|-------|------------|
|               |                  |           | WT      |       | lwd1lwd2 |       | Normalized | WT      |       | lwd1lwd2 |       | Normalized |
|               |                  |           | Control | Flags | Raw      | Flags |            | Control | Flags | Raw      | Flags |            |
| Photoperiodic | <i>PRR5</i>      | At5g24470 | 238.47  | P     | 1219.9   | P     | 5.12       | 215.89  | P     | 874.5    | P     | 4.05       |
|               | <i>TOC1/PRR1</i> | At5g61380 | 326.36  | P     | 1623.4   | P     | 4.97       | 207.73  | P     | 1518.7   | P     | 7.31       |
|               | <i>PRR3</i>      | At5g60100 | 151.04  | P     | 692.9    | P     | 4.59       | 110.50  | P     | 834.8    | P     | 7.55       |
|               | <i>LUX</i>       | At3g46640 | 296.17  | P     | 1192.8   | P     | 4.03       | 198.15  | P     | 1681.3   | P     | 8.49       |
|               | <i>FKF1</i>      | At1g68050 | 223.99  | P     | 754.5    | P     | 3.37       | 293.19  | P     | 627.9    | P     | 2.14       |
|               | <i>ELF4</i>      | At2g40080 | 1061.61 | P     | 2479.6   | P     | 2.34       | 1028.73 | P     | 2103.7   | P     | 2.04       |
|               | <i>GI</i>        | At1g22770 | 760.31  | P     | 1689.5   | P     | 2.22       | 867.16  | P     | 1550.6   | P     | 1.79       |
|               | <i>CO*</i>       | At5g15840 | 31.63   | A     | 58.2     | P     | 1.84       | 32.77   | A     | 42.7     | A     | 1.30       |
|               | <i>ELF3</i>      | At2g25930 | 383.72  | P     | 698.7    | P     | 1.82       | 351.33  | P     | 744.6    | P     | 2.12       |
|               | <i>LKP2*</i>     | At2g18915 | 296.51  | P     | 226.5    | A     | 0.76       | 257.70  | A     | 309.6    | A     | 1.20       |
|               | <i>PRR7</i>      | At5g02810 | 1050.36 | P     | 743.5    | P     | 0.71       | 1330.09 | P     | 890.8    | P     | 0.67       |
|               | <i>ZTL</i>       | At5g57360 | 445.43  | P     | 278.8    | P     | 0.63       | 603.80  | P     | 325.9    | P     | 0.54       |
|               | <i>CDF1</i>      | At5g62430 | 1622.21 | P     | 814.6    | P     | 0.50       | 1876.84 | P     | 1071.4   | P     | 0.57       |
|               | <i>FT*</i>       | At1g65480 | 201.38  | P     | 77.2     | A     | 0.38       | 162.11  | P     | 85.1     | P     | 0.52       |
|               | <i>CCA1</i>      | At2g46830 | 1186.25 | P     | 228.8    | P     | 0.19       | 1815.33 | P     | 346.5    | P     | 0.19       |
|               | <i>LHY</i>       | At1g01060 | 459.24  | P     | 85.7     | P     | 0.19       | 520.30  | P     | 92.4     | P     | 0.18       |
|               | <i>PRR9</i>      | At2g46790 | 877.27  | P     | 66.2     | P     | 0.08       | 1133.25 | P     | 73.2     | P     | 0.06       |
| <i>SOC1**</i> | At2g45660        |           |         |       |          |       |            |         |       |          |       |            |
| Autonomous    | <i>FLC</i>       | At5g10140 | 1428.84 | P     | 2025.2   | P     | 1.42       | 1596.60 | P     | 1203.1   | P     | 0.75       |
|               | <i>FY</i>        | At5g13480 | 250.62  | P     | 310.2    | P     | 1.24       | 246.49  | P     | 377.2    | P     | 1.53       |
|               | <i>LD</i>        | At4g02560 | 261.98  | P     | 273.6    | P     | 1.04       | 335.32  | P     | 270.8    | P     | 0.81       |
|               | <i>FCA</i>       | At4g16280 | 142.80  | P     | 117.3    | P     | 0.82       | 189.65  | P     | 235.3    | P     | 1.24       |
|               | <i>FVE**</i>     | At2g19520 |         |       |          |       |            |         |       |          |       |            |
|               | <i>FPA**</i>     | At2g43410 |         |       |          |       |            |         |       |          |       |            |
|               | <i>FRJ**</i>     | At4g00650 |         |       |          |       |            |         |       |          |       |            |
|               | <i>DET1**</i>    | At4g10180 |         |       |          |       |            |         |       |          |       |            |
| Vernalization | <i>VRN1</i>      | At3g18990 | 389.85  | P     | 472.5    | P     | 1.21       | 457.26  | P     | 562.5    | P     | 1.23       |
|               | <i>VIP2</i>      | At5g59710 | 472.27  | P     | 423.4    | P     | 0.90       | 405.22  | P     | 402.3    | P     | 0.99       |
|               | <i>VRN2</i>      | At4g16845 | 312.43  | P     | 277.9    | P     | 0.89       | 287.97  | P     | 276.5    | P     | 0.96       |
|               | <i>VIP4</i>      | At5g61150 | 354.20  | P     | 303.2    | P     | 0.86       | 375.83  | P     | 282.1    | P     | 0.75       |
|               | <i>VIP3</i>      | At4g29830 | 712.75  | P     | 489.1    | P     | 0.69       | 399.12  | P     | 388.8    | P     | 0.97       |
|               | <i>VIP1</i>      | At1g43700 | 1489.88 | P     | 985.7    | P     | 0.66       | 1381.80 | P     | 786.2    | P     | 0.57       |
|               | <i>VIP5**</i>    | At1g61040 |         |       |          |       |            |         |       |          |       |            |
| <i>VIP6**</i> | At2g06210        |           |         |       |          |       |            |         |       |          |       |            |
| GA            | <i>SPY</i>       | At3g11540 | 374.92  | P     | 462.4    | P     | 1.23       | 509.74  | P     | 430.9    | P     | 0.85       |
|               | <i>RGA1</i>      | At2g01570 | 1563.95 | P     | 1580.4   | P     | 1.01       | 1952.94 | P     | 1311     | P     | 0.67       |
|               | <i>GAI</i>       | At1g14920 | 1566.51 | P     | 1257.7   | P     | 0.80       | 1125.08 | P     | 1529.3   | P     | 1.36       |

\*Expression data of these genes were classified as "absent" in at least one of the datasets thus were not included in the data presented in Figure 2.

\*\*Probe sets for these genes were not represented on the current ATH1 GeneChip.
